# Supplementary material for: Extracellular Vesicles Derived from Early and Late Stage Plasmodium falciparum-Infected Red Blood Cells Contain Invasion-Associated Proteins
Source: MDPI journal article supplement (doi:10.3390/jcm11144250), 2022-07-21
Supplement: s1 [file s1]

## Supplementary Materials

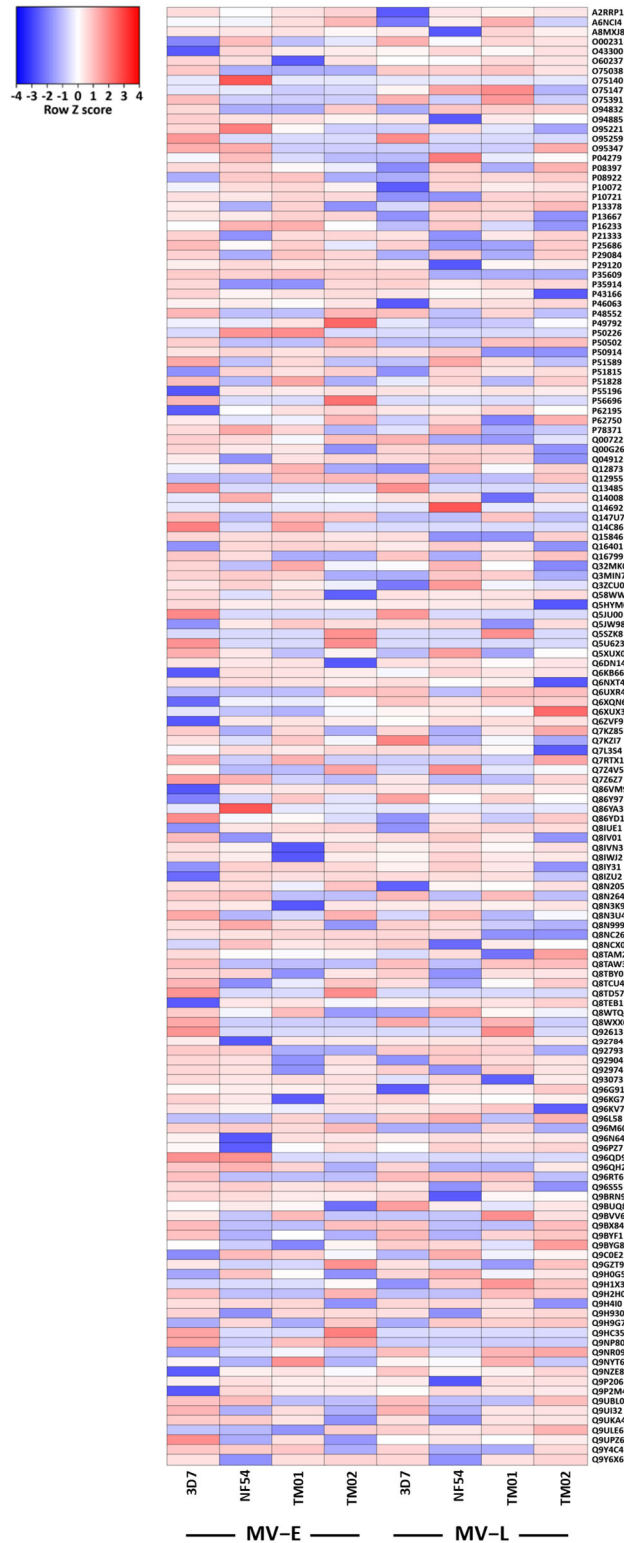

**Figure S1** Heatmap of unique human proteins carried in *Pf*-MV. Side bar indicates differential protein expression between each sample (blue: decrease, red: increase). Rows: proteins; columns: samples.



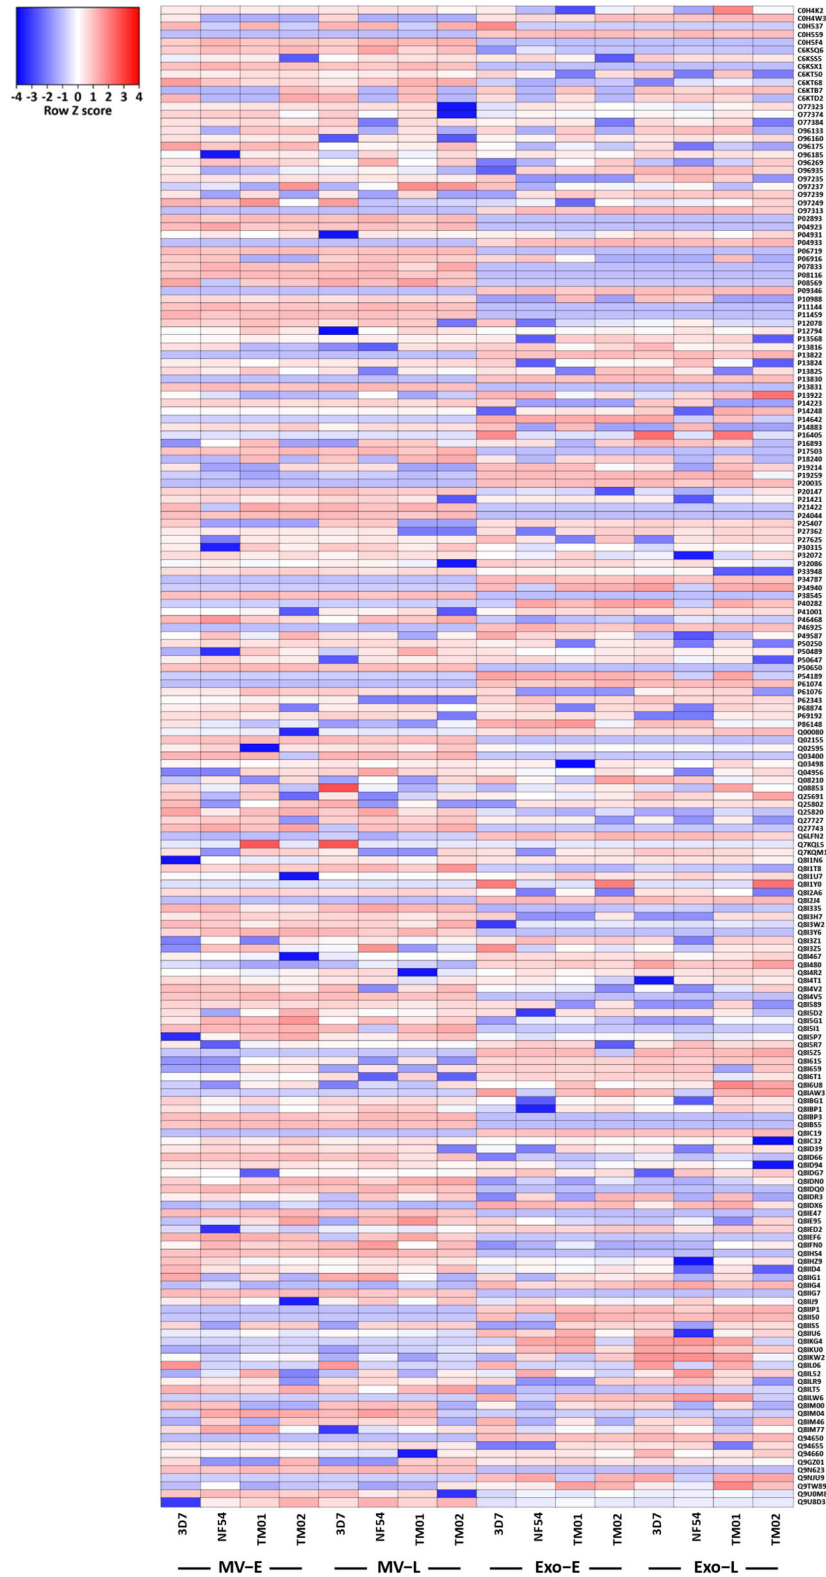

**Figure S3** Heatmap analysis of differential expression levels of *P. falciparum* proteins in each type of *Pf*-EVs from 4 *P. falciparum* strains. Side bar indicates differential protein expression between each sample (blue: decrease, red: increase). Rows: proteins; columns: samples.
